# Supplementary material for: Crym-positive striatal astrocytes gate perseverative behaviour
Source: PubMed Central journal article supplement (PMC10937394; doi:10.1038/s41586-024-07138-0), 2024-02-28
Supplement: 41586_2024_7138_MOESM1_ESM.pdf [file 41586_2024_7138_MOESM1_ESM.pdf]

---

**Supplementary information**

---

***Crym*-positive striatal astrocytes gate perseverative behaviour**

---

In the format provided by the authors and unedited

Corresponding to Extended data Figure 13f

Streptavidin-HRP

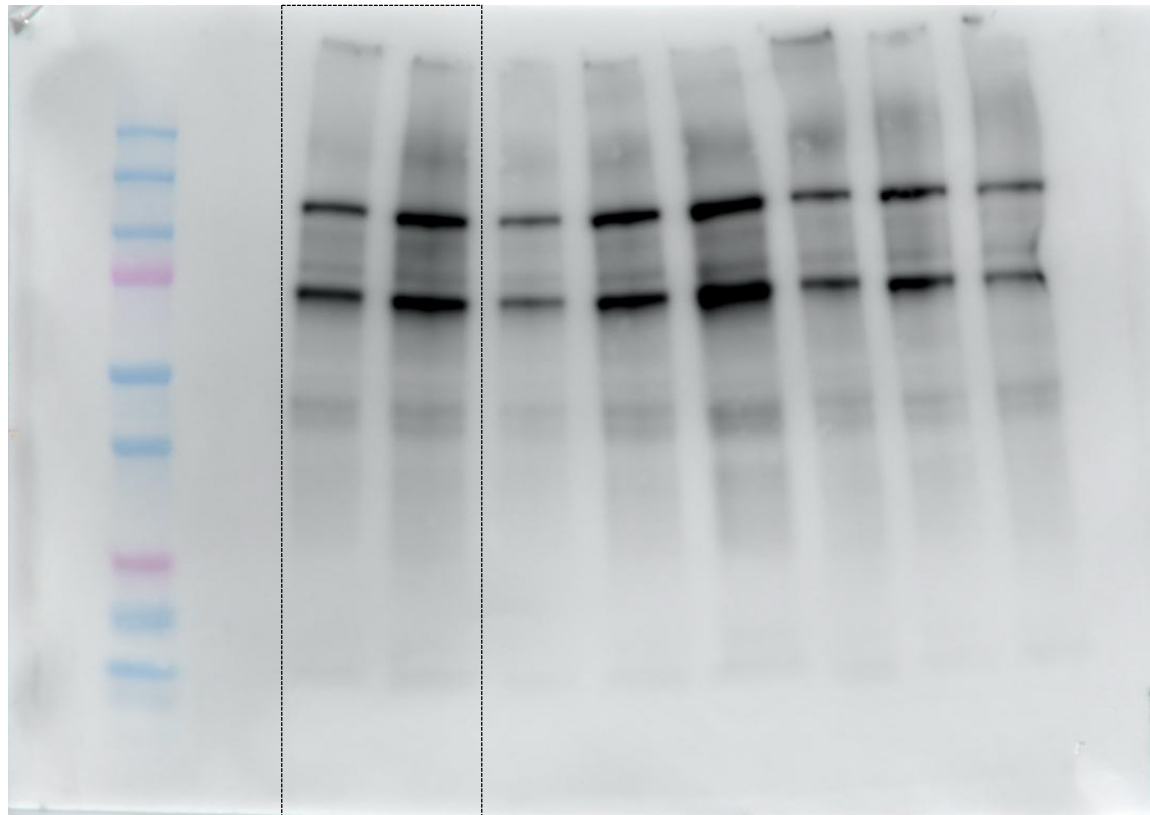

Beta-actin

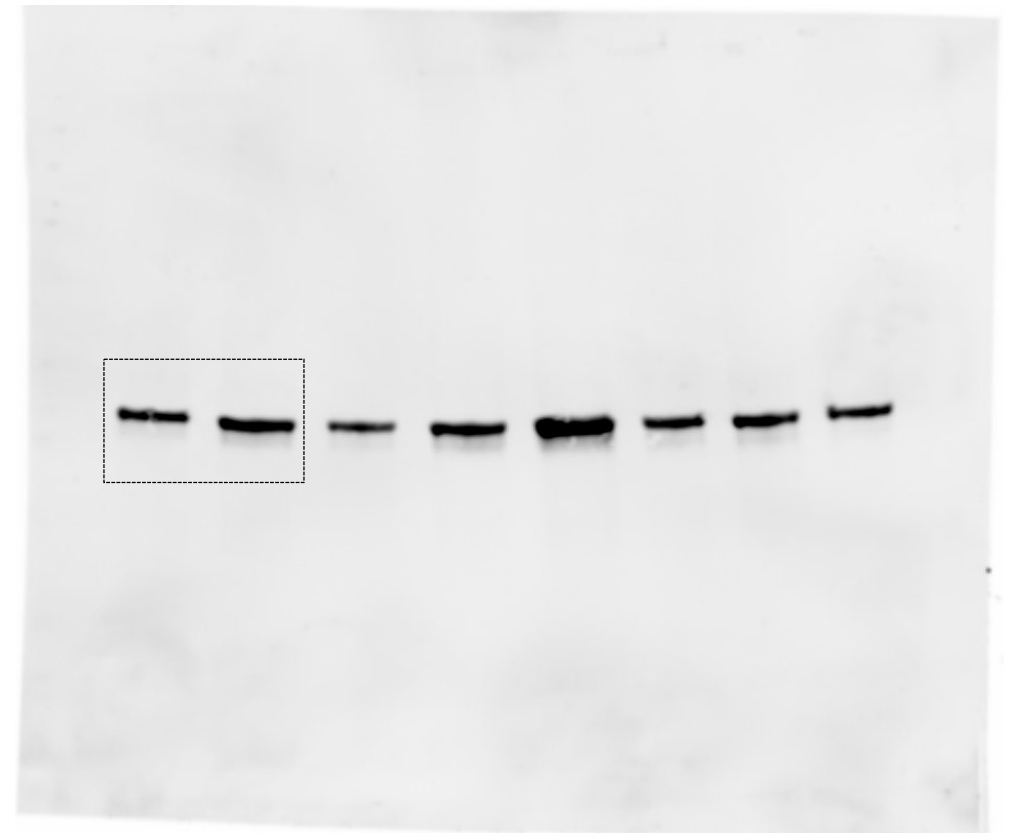

Supplementary Fig 1: Both images represent the same blot. Left image shows chemiluminescence signal, while right blot show fluorescence. Please see methods for further details.
