# Supplementary material for: Crym-positive striatal astrocytes gate perseverative behaviour
Source: PubMed Central journal article supplement (PMC10937394; doi:10.1038/s41586-024-07138-0), 2024-02-28
Supplement: 41586_2024_7138_MOESM4_ESM.pdf [file 41586_2024_7138_MOESM4_ESM.pdf]

| <b>AAV construct</b>                                         | <b>Addgene ID #</b> | <b>Titer</b>               |
|--------------------------------------------------------------|---------------------|----------------------------|
| *AAV2/5 <i>U6-sgRNA-Crym(x3)-GfaABC<sub>1</sub>D-mCherry</i> | 200067              | $3 \times 10^{13}$ gc/ml   |
| *AAV2/5 <i>U6-sgRNA-GFP-GfaABC<sub>1</sub>D-mCherry</i>      | 200068              | $2.1 \times 10^{13}$ gc/ml |
| *AAV2/5 <i>GfaABC<sub>1</sub>D-Crym-EGFP</i>                 | 200080              | $2.5 \times 10^{13}$ gc/ml |
| *AAV2/5 <i>GfaABC<sub>1</sub>D-jGCaMP8m</i>                  | 213010              | $2.2 \times 10^{13}$ gc/ml |
| AAV1 <i>hSyn-Chronos-GFP</i>                                 | 59170               | $1.4 \times 10^{13}$ gc/ml |
| AAV1 <i>hSyn-hM4D(Gi)-mCherry</i>                            | 50475               | $2.4 \times 10^{13}$ gc/ml |
| AAV1 <i>hSyn-mCherry</i>                                     | 114472              | $2.4 \times 10^{13}$ gc/ml |
| AAV2/5 <i>GfaABC<sub>1</sub>D-Rpl22-HA</i>                   | 111811              | $2.1 \times 10^{13}$ gc/ml |
| AAV 2/5 <i>GfaABC<sub>1</sub>D-Crym-BioID2-HA</i>            | 200070              | $3.1 \times 10^{13}$ gc/ml |
| AAV1 <i>CaMKIIa-hChR2(H134R)-mCherry</i>                     | 26975               | $2 \times 10^{13}$ gc/ml   |
| AAV2/5 <i>GfaABC<sub>1</sub>D-tdTomato</i>                   | 44332               | $2 \times 10^{13}$ gc/ml   |

**Supplemental Table 1.** Plasmids used in this study (\* new AAV plasmids generated in this study).
